# Supplementary material
Source: publisher site journal article supplement (https://www.spandidos-publications.com/4140/downloadSupplementary)
Supplement: Supplementary file 1 [file downloadSupplementary]

Table SI. Primers, shRNA sequences and FISH probe.

| A, Primers |                         |                          |
|------------|-------------------------|--------------------------|
| Genes      | Forward primer (5'-3')  | Reverse primer (5'-3')   |
| lncCCAT1   | GCCGTGTTAAGCATTGCGAA    | TCATGTCTCGGCACCTTTCC     |
| ACC1       | ATGAACCATCTCCCTTGGCC    | TCCCCAAAGCGAGTAACAA      |
| ACLY       | GACTTCGGCAGAGGTAGAGC    | TCAGGAGTGACCCGAGCATA     |
| ELOVL6     | CCTGGATGTAGCTGAGAGGC    | CTTCCGGGAGACTCGGAAAC     |
| FASN       | AGGCCTCATAGACCTGCTGA    | GGGAGATGAGGGGAGTTCC      |
| SCD1       | CTGGCTTGCTGATGATGTGC    | TCTCCGGTCATAGGCCAGA      |
| SCD5       | TCTGGGGAGAGAGTCTGTGG    | TTGTCATAGGGCCGGTTTCC     |
| PKM2       | TCTCTTCGTCTTTGCAGCGT    | AGATCTTGCTGCCACTTCC      |
| SREBP2     | GGGTTGTCGGGTGTCATGG     | GGCTGCCATCTGTCTTCAGT     |
| GAPDH      | CGGAGTCAACGATTTGGTCGTAT | AGCCTTCTCCATGGTGGTGAAGAC |

| B, shRNA sequences (5'-3') |                                                                 |
|----------------------------|-----------------------------------------------------------------|
| sh-NC<br>(lncCCAT1)        | CCGGATGTGGCTTTTCATTCTTATACTCGAGTATAAGAATGAAAAGCCACA<br>TTTTTTG  |
| sh-<br>lncCCAT1#1          | CCGGTAGAAGTTAAACATTCATCCACTCGAGTGGATGAATGTTAACTTCT<br>ATTTTTG   |
| sh-<br>lncCCAT1#2          | CCGGAGAAGTTAAACATTCATCCAGCTCGAGCTGGATGAATGTTAACTTC<br>TTTTTTG   |
| sh-<br>lncCCAT1#3          | CCGGTTGCTAATCTAGAAGAAGGGACTCGAGTCCCTTCTTCTAGATTAGCA<br>ATTTTTG  |
| sh-NC<br>(PKM2)            | CCGGAAATAGATTGTCCCTCTGTTCCCTCGAGGAACAGAGGGACAATCTAT<br>TTTTTTTG |
| sh-PKM2#1                  | CCGGTTAATCATCTCCTTCAACGTCCTCGAGGACGTTGAAGGAGATGATTA<br>ATTTTTG  |
| sh-PKM2#2                  | CCGGACTTCATGGACATCAGATGCCCTCGAGGGCATCTGATGTCCATGAA<br>GTTTTTTG  |
| sh-PKM2#3                  | CCGGAATTGCAAGTGGTAGATGGCACTCGAGTGCCATCTACCACTTGCAA<br>TTTTTTTG  |

| C, FISH probe (5'-3') |                                                                                                                                                                                                                                                                                                                                                                                                                                                                                                                                                                                                                                                                                                                                                                                                                                                                                                                                                                                                                                                                                                                                                                                                                                                                                                                                                          |
|-----------------------|----------------------------------------------------------------------------------------------------------------------------------------------------------------------------------------------------------------------------------------------------------------------------------------------------------------------------------------------------------------------------------------------------------------------------------------------------------------------------------------------------------------------------------------------------------------------------------------------------------------------------------------------------------------------------------------------------------------------------------------------------------------------------------------------------------------------------------------------------------------------------------------------------------------------------------------------------------------------------------------------------------------------------------------------------------------------------------------------------------------------------------------------------------------------------------------------------------------------------------------------------------------------------------------------------------------------------------------------------------|
| lncCCAT1<br>probe     | ATTATGCTGAGTGATATCCTTACAAATGGGATTCTTCACCCACTCCCTTCTT<br>CTAGATTAGCAATGCCCTGTTAAGTAAACGAACACGAAATTCAAAGGGAA<br>ACAGGAGCAATCATCATTACCAGCTGCCGTGTTAAGCATTGCGAAAACGC<br>TCACGATTCACAGAAAAATCCATGCTGTTCTTTGAAGGCATTCAAGCCTTA<br>ATAGCTAGCTGGATGAATGTTTAACTTCTAGGCCAGGCACTACTCTGTCCC<br>AACATAAGCCCTGTACATTGGGAAAGGTGCCGAGACATGAACTTTGGTC<br>TTCTCTGCAATCCATCTGGAGCATTCACTGACAACATCGACTTTGAAGTTG<br>CACTGACCTGGCCAGCCCTGCCACTTACCAGGTTGGCTCTGTATGGCTAAG<br>CGTTTTCTCCTAAAATCCCTTGA AAAACTGTGAGAAGACCATAAGAAGATC<br>ATATCTTTAATTCTATTTACACAAGTCACACAATATTCCAATCAAATACAGA<br>TGGTTGAGAAAAGTCATCCATCTTCCCTCCCCACCCTCCCACAGCCCCTCA<br>ACCACTGCCCTGAAACTTATATGCTGTTATCCGCAGCTCCATCTGGAGCAT<br>CACAGCTACTGTCAACCCTGACGCTCTTTCTGAAAAAACACCGGATGGAC<br>ATCAGAACTATTTCTTTAAGGATGTTACTGAGCCACACAGGAAAACCTTGCC<br>TTATGATTTTGAATGCACGGATCTGATTTGACTAAACATGATAACTAGAGA<br>ATCACCAATCTACTCCATTTTCAACTCTAAATCATCAGAGTGTCTCAA<br>TCCAAAGCACACACAGACCAGCCTGGCCAACACGGTGA AACTCCACCCCT<br>ACTAAAAGTATAAAAATTATCCAGGTGTGGTGGCGGGCGCCTGTAATCCA<br>AGCTACTTGGGAGTCTGGAGGCAGGAGATAACCCCTGAACTGGGAGATGG<br>AGGTTGCAGTGAGCAGAGATCACACCACCGCACTCTAGCCTGGGCCACAA<br>ATCAACAACAACAACAACAACAACAACAACAAGCGCACACAGAGACTGAG<br>GTCTCTTTGGCATTGAGAAGATGGCTATGCAAGTCCCAACTAGCAAGTG<br>CAAACCTCCAGCTTCACTTCTGCCAGTGTCCTTCAACCCCTTCTCAACCC<br>ACTGGGAGGCAGGAGGGTGCTTGACAATAACAGCCTTGGCATCACTCTGC |

|  |                                                                                      |
|--|--------------------------------------------------------------------------------------|
|  | CAGGGTGAATAGGAACTGTTACAATTCTGAGATTCTGTGTAAGCACTGG<br>CCTTTCTGCCTAGAATGCCTTCTCCTCTCTT |
|--|--------------------------------------------------------------------------------------|
